# Supplementary material for: Soil Amendments with Spearmint, Peppermint and Rosemary Enhance the Community of Free-Living Nematodes and Improve Soil Quality, While Having Strikingly Different Effects on Plant Growth
Source: MDPI journal article supplement (doi:10.3390/life12081121), 2022-07-26
Supplement: s1 [file s1]

**Table S1.** Results of PERMANOVA for the effect of “amendment” and “decomposition” (within factor “amendment”) on the fresh weight of tomato plants.

| <b>Source</b> | <b><i>df</i></b> | <b><i>SS</i></b> | <b><i>MS</i></b> | <b><i>F</i></b> | <b><i>p</i></b> |
|---------------|------------------|------------------|------------------|-----------------|-----------------|
| Amendment     | 3                | 29128.432        | 9709.477         | 58.253          | 0.0002          |
| Decomposition | 8                | 31855.276        | 3981.909         | 23.890          | 0.0002          |
| Residual      | 24               | 4000.252         | 166.677          |                 |                 |
| Total         | 35               | 64983.960        |                  |                 |                 |

**Table S2.** Results of PERMANOVA for the effect of “amendment”, “decomposition” (within factor “amendment”) and “tomato presence” (within factor “decomposition” within factor “amendment”) on soil properties.

|                 | Source        | df | SS       | MS       | F      | p      |
|-----------------|---------------|----|----------|----------|--------|--------|
| Corg %          | Amendment     | 3  | 1555.81  | 518.60   | 8.43   | 0.0002 |
|                 | Decomposition | 8  | 21325.14 | 2665.64  | 43.32  | 0.0002 |
|                 | Tomato        | 12 | 358.02   | 29.83    | 0.48   | 0.9268 |
|                 | Residual      | 48 | 2953.38  | 61.53    |        |        |
|                 | Total         | 71 | 26192.35 |          |        |        |
| Norg %          | Amendment     | 3  | 5084.31  | 1694.77  | 237.58 | 0.0002 |
|                 | Decomposition | 8  | 454.19   | 56.77    | 7.96   | 0.0002 |
|                 | Tomato        | 12 | 108.85   | 9.07     | 1.27   | 0.2616 |
|                 | Residual      | 48 | 342.41   | 7.13     |        |        |
|                 | Total         | 71 | 5989.75  |          |        |        |
| Corg:Norg       | Amendment     | 3  | 4106.20  | 1368.73  | 24.47  | 0.0002 |
|                 | Decomposition | 8  | 23734.61 | 2966.83  | 53.04  | 0.0002 |
|                 | Tomato        | 12 | 478.74   | 39.89    | 0.71   | 0.7428 |
|                 | Residual      | 48 | 2685.13  | 55.94    |        |        |
|                 | Total         | 71 | 31004.68 |          |        |        |
| NH <sub>4</sub> | Amendment     | 3  | 41247.38 | 1349.12  | 37.51  | 0.0002 |
|                 | Decomposition | 8  | 17627.40 | 2203.43  | 6.01   | 0.0002 |
|                 | Tomato        | 12 | 9523.27  | 793.61   | 2.16   | 0.016  |
|                 | Residual      | 48 | 17595.04 | 366.56   |        |        |
|                 | Total         | 71 | 85993.09 |          |        |        |
| NO <sub>3</sub> | Amendment     | 3  | 43853.03 | 14617.68 | 128.66 | 0.0002 |
|                 | Decomposition | 8  | 17704.76 | 2213.10  | 19.48  | 0.0002 |
|                 | Tomato        | 12 | 1457.22  | 121.43   | 1.07   | 0.3964 |
|                 | Residual      | 48 | 5453.36  | 113.61   |        |        |
|                 | Total         | 71 | 68468.38 |          |        |        |
| P               | Amendment     | 3  | 4849.20  | 1616.40  | 5.53   | 0.0012 |
|                 | Decomposition | 8  | 23492.36 | 2936.54  | 10.05  | 0.0002 |
|                 | Tomato        | 12 | 12508.23 | 1042.35  | 3.57   | 0.0008 |
|                 | Residual      | 48 | 14020.46 | 292.09   |        |        |
|                 | Total         | 71 | 54870.26 |          |        |        |
| K               | Amendment     | 3  | 55675.08 | 18558.36 | 600.64 | 0.0002 |
|                 | Decomposition | 8  | 859.56   | 107.44   | 3.48   | 0.0034 |
|                 | Tomato        | 12 | 392.66   | 32.72    | 1.06   | 0.41   |
|                 | Residual      | 48 | 1483.10  | 30.90    |        |        |
|                 | Total         | 71 | 58410.40 |          |        |        |
| Mg              | Amendment     | 3  | 1534.17  | 511.39   | 167.88 | 0.0002 |
|                 | Decomposition | 8  | 756.10   | 94.51    | 31.03  | 0.0002 |
|                 | Tomato        | 12 | 21.92    | 1.83     | 0.60   | 0.8318 |
|                 | Residual      | 48 | 146.22   | 3.05     |        |        |
|                 | Total         | 71 | 2458.41  |          |        |        |

**Table S3.** Results of PERMANOVA for the effect of “amendment”, “decomposition” (within factor “amendment”) and “tomato presence” (within factor “decomposition” within factor “amendment”) on the abundance of the total nematode community and individual trophic groups, on nematode functional indices as well as on the nematode metabolic footprint.

|                           | Source        | df | SS        | MS       | F       | P      |
|---------------------------|---------------|----|-----------|----------|---------|--------|
| Total abundance           | Amendment     | 3  | 58425.13  | 19475.04 | 65.16   | 0.0002 |
|                           | Decomposition | 8  | 52167.13  | 6520.89  | 21.82   | 0.0002 |
|                           | Tomato        | 12 | 4321.70   | 360.14   | 1.20    | 0.1912 |
|                           | Residual      | 48 | 14346.58  | 298.89   |         |        |
|                           | Total         | 71 | 129260.54 |          |         |        |
| Abundance of Bacterivores | Amendment     | 3  | 54250.55  | 18083.52 | 47.1101 | 0.0002 |
|                           | Decomposition | 8  | 59870.75  | 7483.844 | 19.4965 | 0.0002 |
|                           | Tomato        | 12 | 4962.521  | 413.5434 | 1.0773  | 0.3814 |
|                           | Residual      | 48 | 18425.11  | 383.8564 |         |        |
|                           | Total         | 71 | 137508.9  |          |         |        |
| Abundance of Fungivores   | Amendment     | 3  | 61103.83  | 20367.94 | 43.00   | 0.0002 |
|                           | Decomposition | 8  | 31714.70  | 3964.34  | 8.37    | 0.0002 |
|                           | Tomato        | 12 | 5309.89   | 442.49   | 0.93    | 0.5442 |
|                           | Residual      | 48 | 22736.91  | 473.69   |         |        |
|                           | Total         | 71 | 120865.33 |          |         |        |
| Abundance of Herbivores   | Amendment     | 3  | 29851.66  | 9950.55  | 4.76    | 0.0014 |
|                           | Decomposition | 8  | 47962.77  | 5995.35  | 2.87    | 0.0034 |
|                           | Tomato        | 12 | 19759.88  | 1646.66  | 0.79    | 0.7334 |
|                           | Residual      | 48 | 100237.62 | 2088.28  |         |        |
|                           | Total         | 71 | 197811.93 |          |         |        |
| Abundance of Omnivores    | Amendment     | 3  | 41555.31  | 13851.77 | 8.19    | 0.0002 |
|                           | Decomposition | 8  | 71737.91  | 8967.24  | 5.30    | 0.0002 |
|                           | Tomato        | 12 | 35112.60  | 2926.05  | 1.73    | 0.027  |
|                           | Residual      | 48 | 81200.45  | 1691.68  |         |        |
|                           | Total         | 71 | 229606.27 |          |         |        |
| Metabolic Footprint       | Amendment     | 3  | 67939.99  | 22646.66 | 51.37   | 0.0002 |
|                           | Decomposition | 8  | 74237.89  | 9279.74  | 21.05   | 0.0002 |
|                           | Tomato        | 12 | 5886.31   | 490.53   | 1.11    | 0.3346 |
|                           | Residual      | 48 | 21160.06  | 440.83   |         |        |
|                           | Total         | 71 | 169224.2  |          |         |        |
| MI                        | Amendment     | 3  | 1587.37   | 529.12   | 39.02   | 0.002  |
|                           | Decomposition | 8  | 4629.43   | 578.68   | 42.67   | 0.002  |
|                           | Tomato        | 12 | 51.54     | 4.29     | 0.32    | 0.98   |
|                           | Residual      | 48 | 650.95    | 13.56    |         |        |
|                           | Total         | 71 | 6919.29   |          |         |        |
| PPI                       | Amendment     | 3  | 31719.50  | 10573.17 | 5.76    | 0.0012 |
|                           | Decomposition | 8  | 26836.11  | 3354.51  | 1.83    | 0.0888 |
|                           | Tomato        | 12 | 11790.61  | 982.55   | 0.53    | 0.8828 |
|                           | Residual      | 48 | 88169.49  | 1836.86  |         |        |
|                           | Total         | 71 | 158515.71 |          |         |        |
| BI                        | Amendment     | 3  | 21652.82  | 7217.608 | 25.251  | 0.0002 |
|                           | Decomposition | 8  | 62640.49  | 7830.062 | 27.3937 | 0.0002 |
|                           | Tomato        | 12 | 1460.073  | 121.6728 | 0.4257  | 0.9836 |
|                           | Residual      | 48 | 13720.06  | 285.8346 |         |        |
|                           | Total         | 71 | 99473.45  |          |         |        |
| EI                        | Amendment     | 3  | 6422.94   | 2140.98  | 53.82   | 0.0002 |
|                           | Decomposition | 8  | 19308.39  | 2413.55  | 60.67   | 0.0002 |

|    |               |    |           |          |       |        |
|----|---------------|----|-----------|----------|-------|--------|
|    | Tomato        | 12 | 221.54    | 18.46    | 0.46  | 0.9472 |
|    | Residual      | 48 | 1909.41   | 39.78    |       |        |
|    | Total         | 71 | 27862.28  |          |       |        |
| CI | Amendment     | 3  | 14414.26  | 4804.75  | 10.01 | 0.0002 |
|    | Decomposition | 8  | 80976.16  | 10122.02 | 21.08 | 0.0002 |
|    | Tomato        | 12 | 4089.401  | 340.78   | 0.71  | 0.8034 |
|    | Residual      | 48 | 23046.88  | 480.14   |       |        |
|    | Total         | 71 | 122526.7  |          |       |        |
| SI | Amendment     | 3  | 20978.78  | 6992.93  | 4.15  | 0.0082 |
|    | Decomposition | 8  | 34277.32  | 4284.67  | 2.54  | 0.0138 |
|    | Tomato        | 12 | 30035.50  | 2502.96  | 1.49  | 0.1444 |
|    | Residual      | 48 | 80828.24  | 1683.92  |       |        |
|    | Total         | 71 | 166119.84 |          |       |        |
